# Supplementary material for: Immunomodulatory Effects of Nanoparticles on Skin Allergy
Source: PubMed Central journal article supplement (PMC5479793; doi:10.1038/s41598-017-03729-2), 2017-06-21
Supplement: 41598_2017_3729_MOESM1_ESM.pdf [file 41598_2017_3729_MOESM1_ESM.pdf]

# Supplementary Methods, Tables and Figures

## Immunomodulatory Effects of Nanoparticles on Skin Allergy

Samreen Jatana<sup>a</sup>, Brian C. Palmer<sup>b</sup>, Sarah Phelan<sup>b</sup>, Lisa A. DeLouise<sup>a,c</sup>

<sup>a</sup> Department of Biomedical Engineering, University of Rochester, Rochester, New York, USA.

<sup>b</sup> Department of Toxicology, University of Rochester Medical Center, New York, USA

<sup>c</sup> Department of Dermatology, University of Rochester Medical Center, Rochester, New York, USA.

Lisa A. DeLouise  
University of Rochester Medical Center  
School of Medicine and Dentistry  
601 Elmwood Avenue, Box 697  
Rochester, NY-14642  
Tel: (585) 275-1810  
E-mail: [Lisa\\_DeLouise@urmc.rochester.edu](mailto:Lisa_DeLouise@urmc.rochester.edu)

# Supplementary Tables

**Supplementary Table 1: List of Materials Used in the experiments**

| <b>Product</b>                                                                    | <b>Company</b>                                                                | <b>Catalogue #</b> |
|-----------------------------------------------------------------------------------|-------------------------------------------------------------------------------|--------------------|
| Quantum Dots (QD)-Lipophilic                                                      | NN Labs                                                                       | CZ-600-25          |
| 20 nm Silica Nanoparticles                                                        | Nanocomposix                                                                  | ECP1011            |
| 50 nm Aminated Silica Nanoparticles                                               | Nanocomposix                                                                  | DAC1635            |
| 50 nm Silica Nanoparticles                                                        | Nanocomposix                                                                  | STH0069            |
| 160 nm Silica Nanoparticles                                                       | Nanocomposix                                                                  | DAC1239            |
| 400 nm Silica Nanoparticles                                                       | Nanocomposix                                                                  | STH0018            |
| Carbon Nanotubes (pore diameter 30nm, length 5-20 um, suspended in water 1 mg/ml) | Nano-lab                                                                      | PD30L5-20-COOH     |
| 20 nm Gold Nanoparticles                                                          | Sigma Aldrich                                                                 | 753610-25ML        |
| 20 nm Silver Nanoparticles                                                        | Nanocomposix                                                                  | AGCN20-25M         |
| Titanium Dioxide (1% Mn Dopant)                                                   | Sigma Aldrich                                                                 | 677469-5G          |
| Acetone (99.9% ACS grade)                                                         | JT Baker                                                                      | 9006-01            |
| Polyethyleneimine Branched                                                        | Sigma Aldrich                                                                 | 408727-100ML       |
| Methoxy Polyethylene glycol                                                       | Jenkem Technology                                                             | M-SH-5000          |
| Glutathione                                                                       | Calbiochem                                                                    | 3541               |
| Dihydrolipoic Acid                                                                | Previously described (Zheng et al., J Biomed Nanotechnol, 2013, 9(3): 382-92) | -                  |
| 1-fluoro-2,4-dinitrobenzene                                                       | Sigma                                                                         | D1529-10ML         |
| Pure Olive Oil                                                                    | Wegman's Brand                                                                |                    |
| 3-pentadecylphenol                                                                | Tokyo Chemical Industry                                                       | P1202              |

**Supplementary Table 2: QD Properties quantified using the Malvern Zetasizer at pH 6.7**

| <b>Surface Coating</b>                  | <b>Zeta Potential (mV)</b> | <b>Hydrodynamic* Diameter (nm)</b> |
|-----------------------------------------|----------------------------|------------------------------------|
| Glutathione<br>GSH-QD                   | -23.0 ± 0.7<br>(Negative)  | 20.0 ± 1.5                         |
| Polyethyleneimine<br>PEI-QD             | +29.8 ± 0.3<br>(Positive)  | 26.7 ± 5.6                         |
| Polyethylene Glycol<br>(Methoxy PEG-QD) | -3.0 ± 4.4<br>(Neutral)    | 26.9 ± 10.3                        |
| Dihydrolipoic Acid<br>(DHLLA-QD)        | -26.2 ± 7.2<br>(Negative)  | 13.6 ± 0.71                        |

\* QD core/shell diameter ~6 nm

**Supplementary Table 3: NP Properties quantified using the Malvern Zetasizer at pH 6.7**

| <b>Particle</b>                   | <b>Size (nm)</b> | <b>Zeta Potential (mV)</b> | <b>PDI</b> |
|-----------------------------------|------------------|----------------------------|------------|
| Silica Nanosphere 20nm            | 32.71 +/- 2.07   | -25.37 +/- 6.44            | 0.217      |
| Silica Nanosphere 50nm            | 66.48 +/- 0.54   | -45.67 +/- 0.59            | 0.076      |
| Silica Nanosphere 50nm (aminated) | 69.32 +/- 1.04   | +17.74 +/- 13.10           | 0.132      |
| Silica Nanosphere 160nm           | 184.93 +/- 0.76  | -33.47 +/- 0.65            | 0.038      |
| Silica Nanosphere 400nm           | 440.00 +/- 4.07  | -65.97 +/- 0.70            | 0.005      |
| Titanium Dioxide <100nm           | 556.40 +/- 33.36 | -9.05 +/- 1.16             | 0.296      |
| Silver Nanoparticle 20nm          | 73.89 +/- 10.25  | -5.98 +/- 1.68             | 0.354      |
| Gold Nanoparticle 20nm            | 69.32 +/- 27.33  | -16.47 +/- 1.56            | 0.318      |

**Supplementary Table 4: Concentration of Nanoparticles in the Co-Challenge Experiments**

| <b>NP Type</b>                            | <b>Stock Concentration</b> | <b>Amount added to 0.2% DNFB in 4:1 Acetone:olive oil medium (500 µl)</b> | <b>Amount applied on the Co-challenge ear (20 µl)</b> |
|-------------------------------------------|----------------------------|---------------------------------------------------------------------------|-------------------------------------------------------|
| <b>GSH-QD*</b>                            | 2.39 µM                    | 24 µl                                                                     | 2.3 x10 <sup>-12</sup> moles, ~2.8 µg                 |
| <b>DHLA-QD*</b>                           | 4.13 µM                    | 14 µl                                                                     | 2.3 x10 <sup>-12</sup> moles, ~2.8 µg                 |
| <b>PEI-QD*</b>                            | 9.72 µM                    | 6 µl                                                                      | 2.3 x10 <sup>-12</sup> moles, ~2.8 µg                 |
| <b>Methoxy PEG-QD*</b>                    | 2.75 µM                    | 21 µl                                                                     | 2.3 x10 <sup>-12</sup> moles, ~2.8 µg                 |
| <b>Organic QD-Lipophilic</b>              | 2.5 mg/ml                  | 10 µl                                                                     | 1 µg                                                  |
| <b>Gold NP (AuNP 20nm)</b>                | ~7.2E11 particles/ml       | 25 µl                                                                     | 7.2E <sup>8</sup> particles, ~0.06 ug**               |
| <b>Carbon Nanotubes (CNT)</b>             | 1 mg/ml                    | 25 µl                                                                     | 1 µg                                                  |
| <b>Titanium dioxide (TiO<sub>2</sub>)</b> | 10% by weight              | 0.05g                                                                     | 2 µg                                                  |
| <b>Silica NP 20nm</b>                     | 10 mg/ml                   | 10 µl                                                                     | 4 µg                                                  |
| <b>Silica NP 160 nm</b>                   | 10 mg/ml                   | 10 µl                                                                     | 4 µg                                                  |
| <b>Silica NP 400nm</b>                    | 10 mg/ml                   | 10 µl                                                                     | 4 µg                                                  |
| <b>Silica NP 50nm aminated</b>            | 10 mg/ml                   | 10 µl                                                                     | 4 µg                                                  |
| <b>Silver NP 20 nm</b>                    | 0.02 mg/ml                 | 0.1 mg                                                                    | 4 µg                                                  |

\*QD MW ~1,210,000 per manufacture technical specification NNLabs, #CZ-600

\*\* 8.08e-17 g /Au particle (20 nm) <http://www.bbisolutions.com/molar-concentration-of-nanoparticles/>

## Supplementary Figure S1

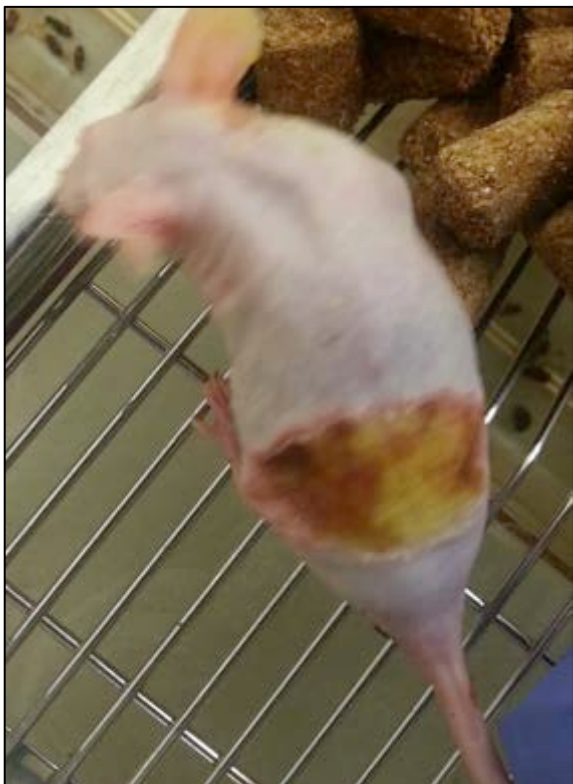

**0.5% DNFB**

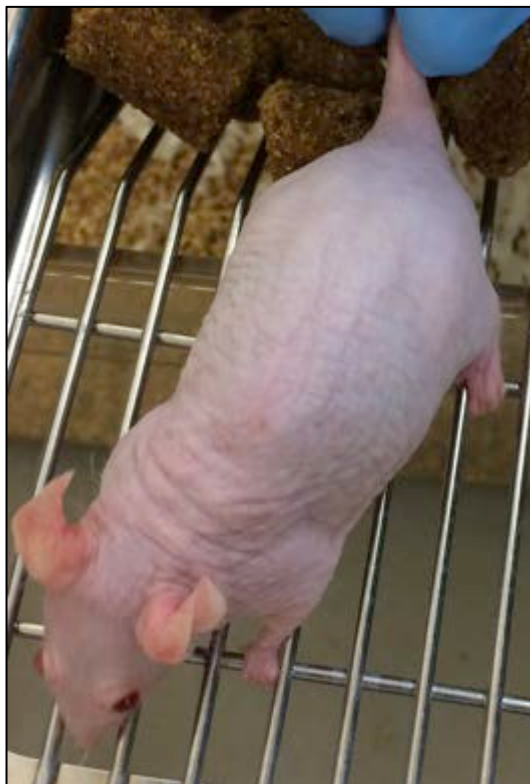

**0.05% DNFB**

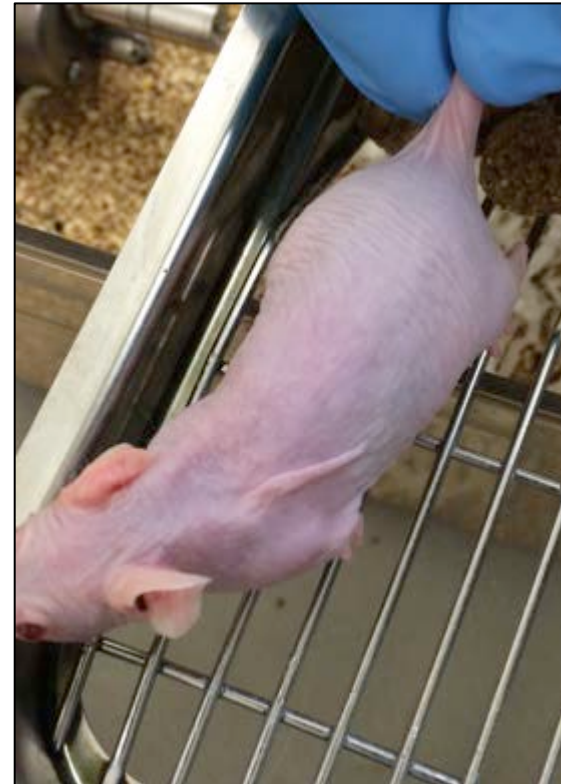

**0.025% DNFB**

### **Supplementary Figure S1: Gross representation of the mouse skin sensitized to 3 different DNFB doses**

Mouse skin (dorsal back) was sensitized to 3 different concentrations of DNFB. 0.5% DNFB causes a chemical burn (eschar) on the skin which is not ideal for NP studies as the skin barrier is impaired. Titration studies indicated that a sensitization dose of 0.05% DNFB in an acetone/olive oil vehicle was sufficient to elicit the expected magnitude ear swelling response following challenge with 0.2% DNFB in our C57BL/6 hairless mice (**Figure S2**) without inducing an eschar that results when the mice are sensitized with the standard 0.5% DNFB dose.

## Supplementary Figure S2

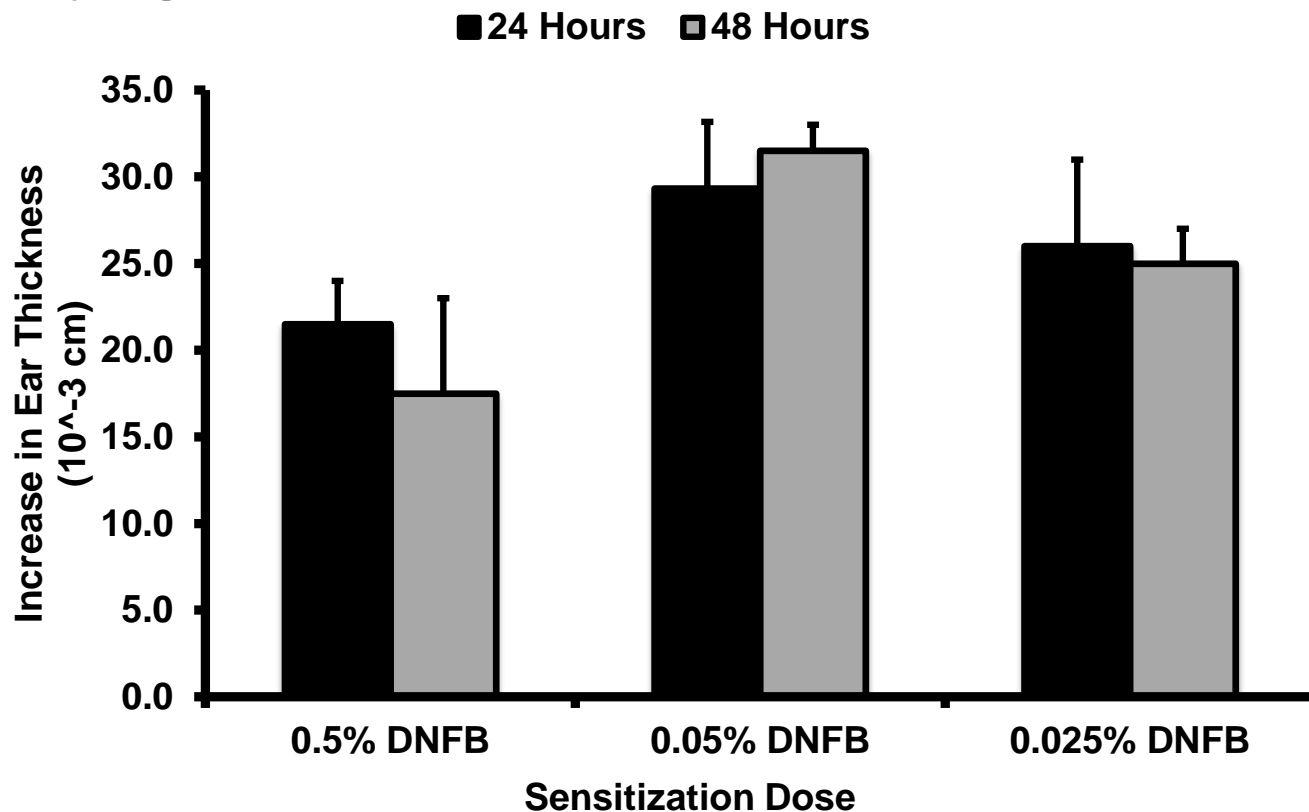

### Supplementary Figure S2: Altering the sensitization dose does not alter the ear swelling response.

Mice were sensitized to 3 different doses-0.5%, 0.05% and 0.025% DNFB in 4:1 acetone: olive oil vehicle. The solution was pipetted on the mouse back (day 0). 5 days later the mice were challenged to 0.2% DNFB (Right ear) and vehicle alone (left ear). The ear swelling response was measured 24 and 48 hours after challenge and quantified with respect to the pre-measurement value. No significant differences were observed between the treatment groups at both 24 and 48 hours. Ears exhibited scab formation around 72 hours. N=3, 2 tailed t-Test, paired with unequal variances.

## Supplementary Figure S3

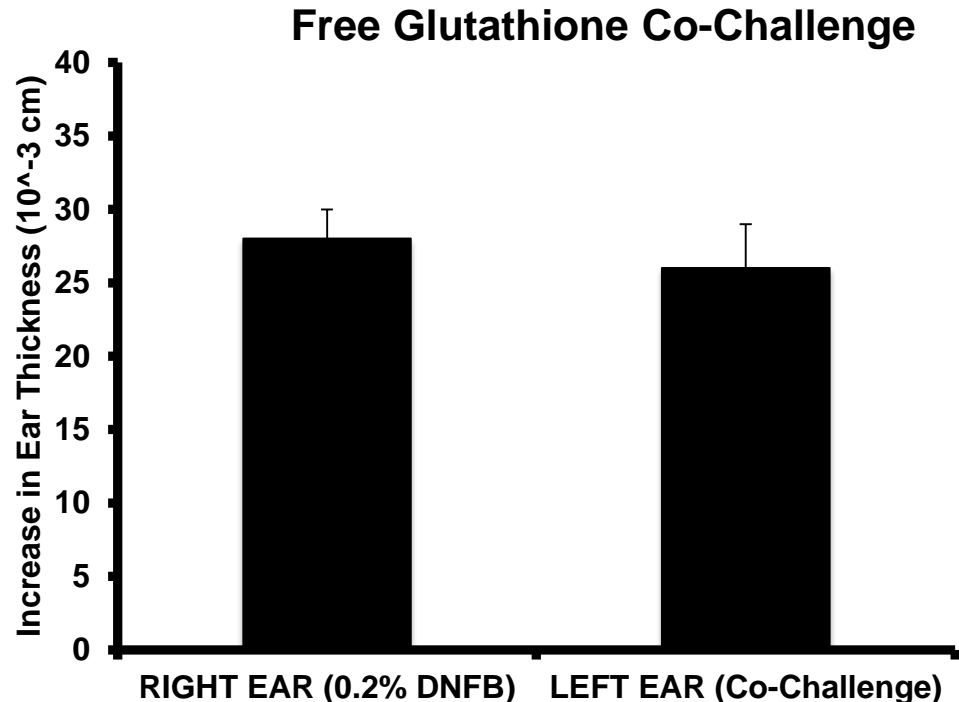

### Supplementary Figure S3: Glutathione tested alone

The left ear was co-challenged with free glutathione plus 0.2% DNFB (left). The right ear was challenged with 0.2% DNFB only. Results show that free glutathione does not inhibit the swelling response compared to the 0.2% DNFB treated ear (right). Glutathione was weighed and added 10% by weight to the vehicle (0.05g GSH in 500  $\mu$ l AOO, 0.325 M). A total 2  $\mu$ g ( $6.5 \times 10^{-6}$  moles, GSH MW=307.3 g/mole) was applied to the co-challenge ear. This dose of free GSH is 1000X more than is estimated to be applied using the GSH-QD assuming that each QD had  $\sim$ 1000 GSH molecules tethered to the surface (**Table S4**).



# Supplementary Figure S4a

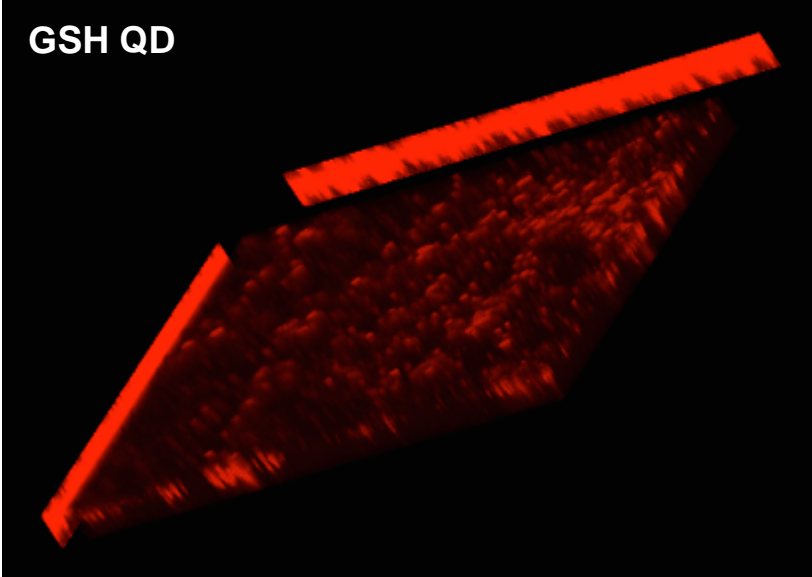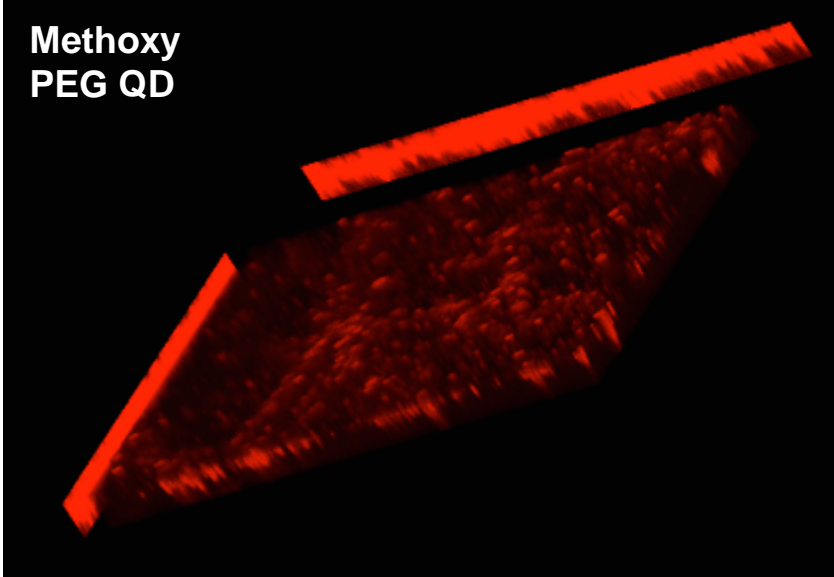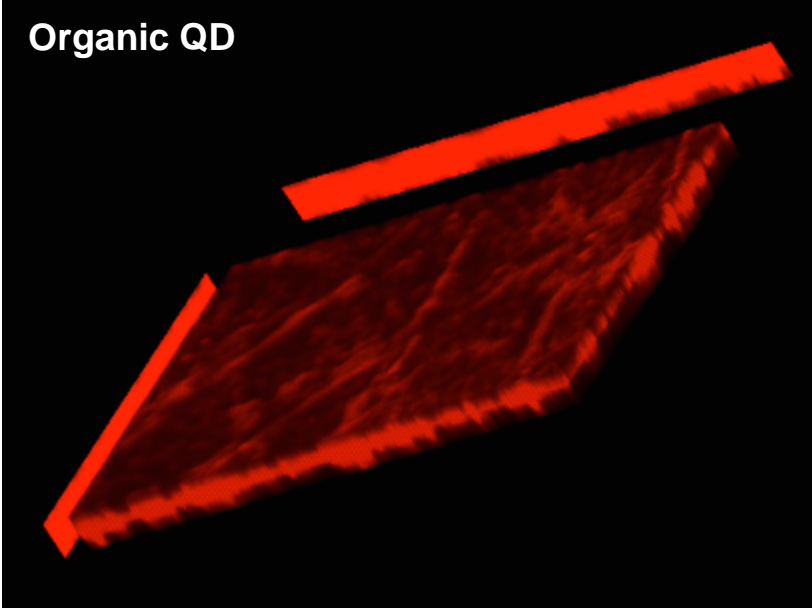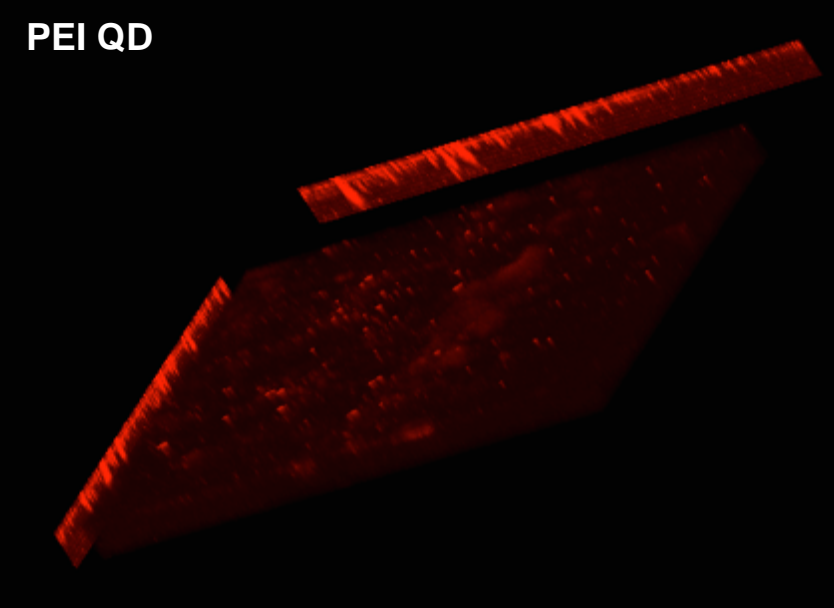

# Supplementary Figures S4b & S4c

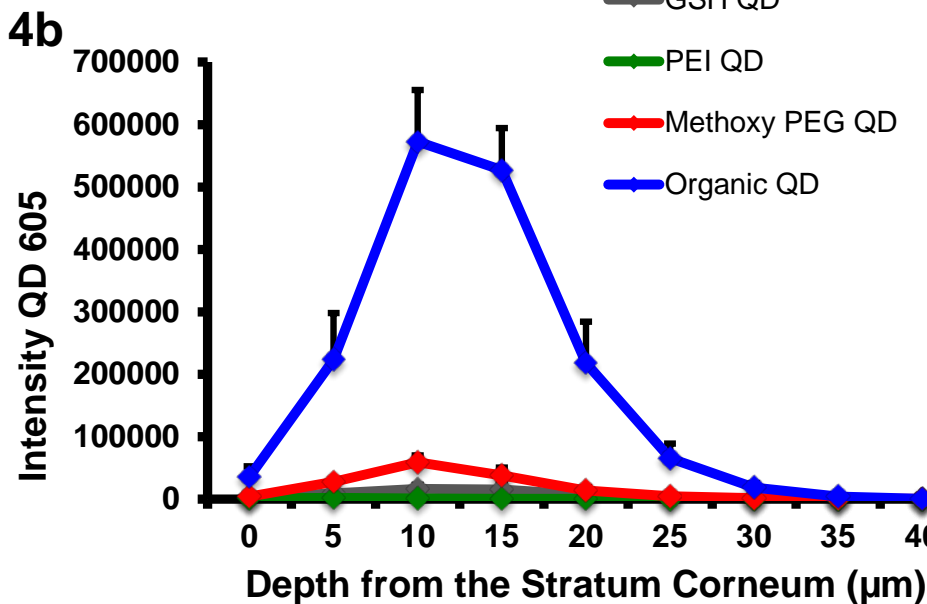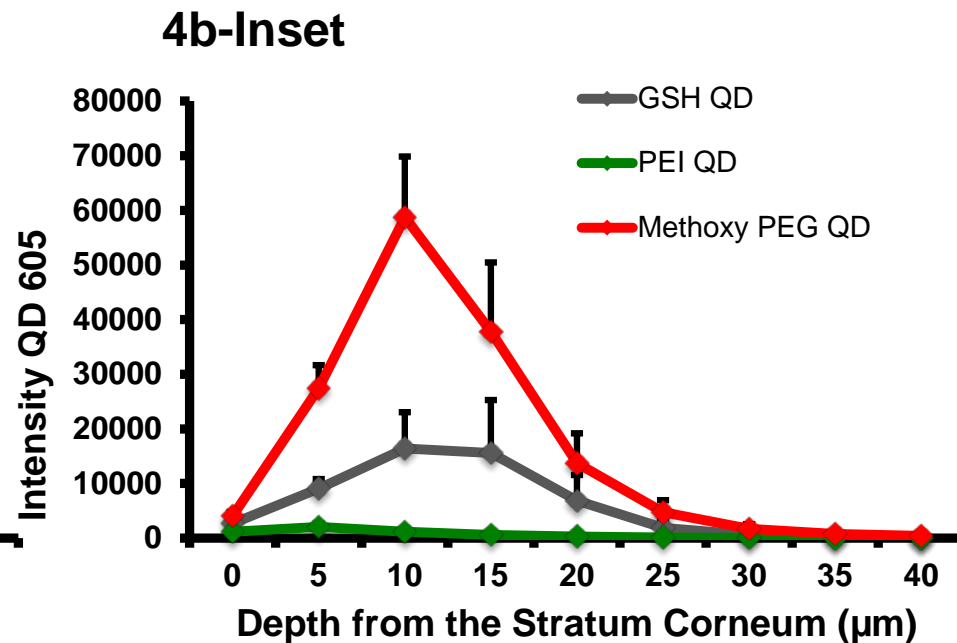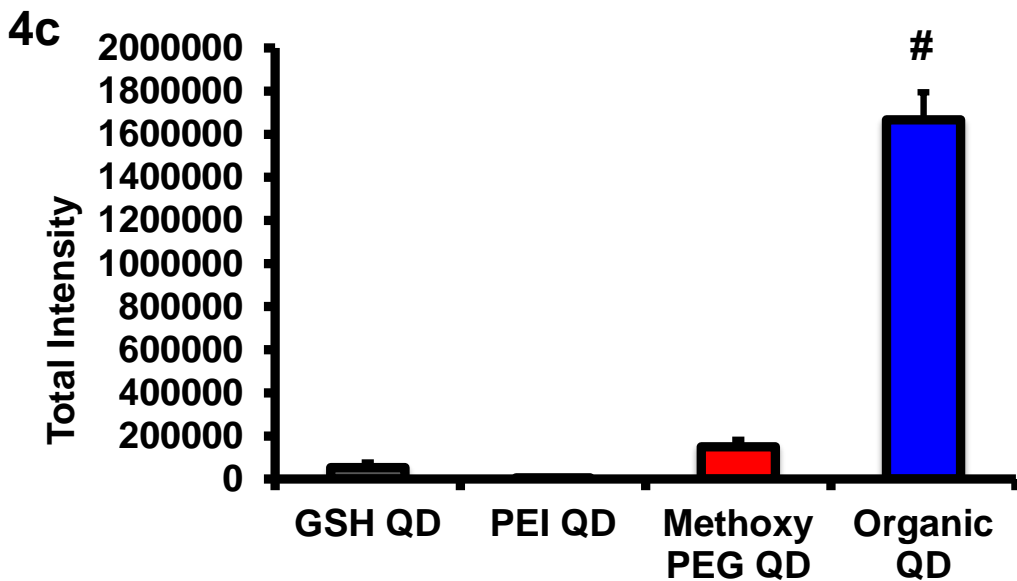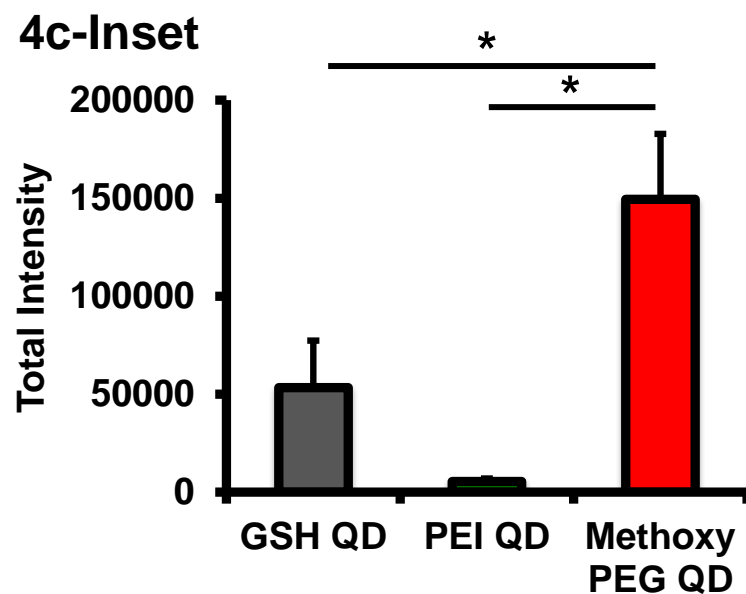

## **Figure S4: Quantification of *ex vivo* penetration of quantum dots in mouse skin using confocal microscopy**

GSH, PEI, methoxy PEG and organic QDs were applied to mouse skin *ex vivo* in an acetone/olive oil vehicle for 24 hours. The samples were wiped with PBS to remove QDs on the skin surface and then imaged using confocal microscopy to detect QD fluorescence in the skin from 0  $\mu\text{m}$  (stratum corneum) to 40  $\mu\text{m}$  deep into the epidermis. The stacks were processed using ImageJ. **(4a)** Side profile view of image stacks shows that GSH, methoxy PEG and organic QDs penetrate more uniformly and deeper into the skin as compared to PEI QDs. PEI-QDs are present in the stratum corneum and accumulation in hair follicles is prominent. **(4b)** Plot shows the QD intensity integrated from 0-40  $\mu\text{m}$ . For all treatment groups the QDs are concentrated in the region between 0-25  $\mu\text{m}$ . The organic QDs accumulate in skin to a greater extent and there is minimal detection of PEI-QD. **(4c)** The bar plot shows the overall QD presence in the treatment groups with organic QDs showing the highest overall retention in skin and PEI-QD the lowest.

\* $p < 0.05$ , 2 tailed t-Test, unpaired with unequal variances

#  $p < 0.05$ , 2 tailed t-Test, unpaired with unequal variances (organic QD group significant wrt to all other test groups),  $N=5$ .

**Supplementary Figure S5**

**Methoxy PEG-QD**

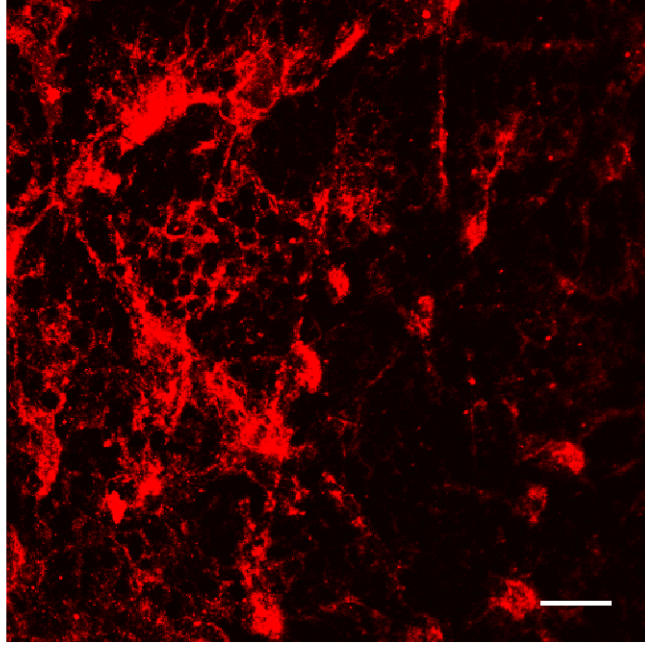

**GSH-QD**

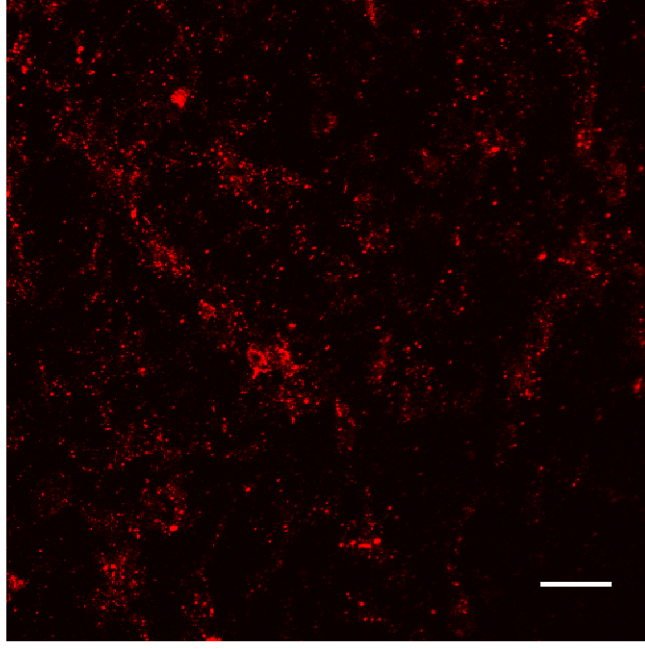

**Organic-QD**

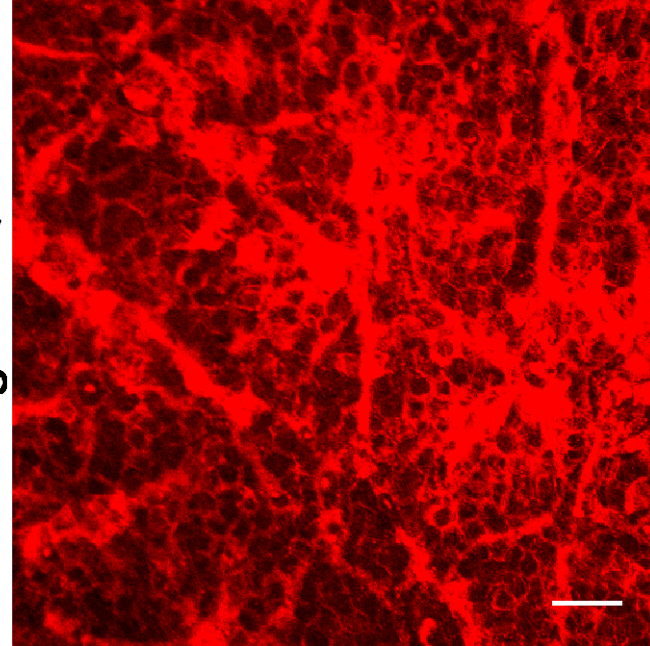

**PEI-QD**

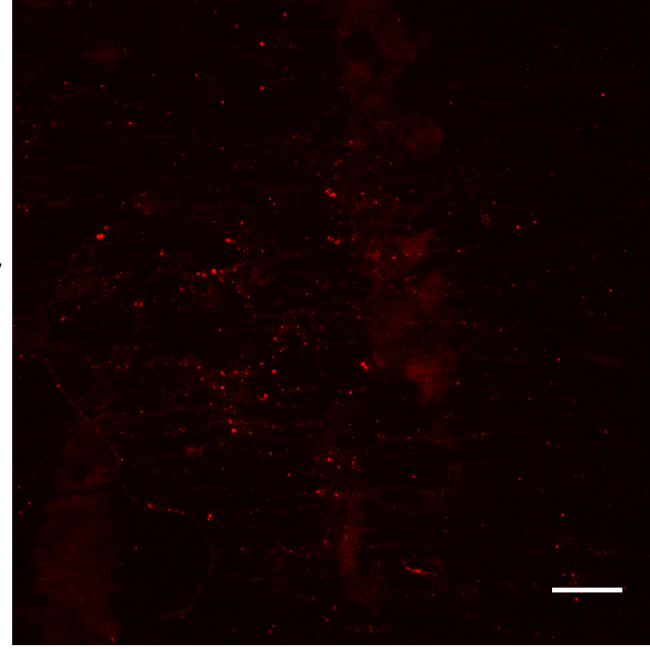

**Supplementary Figure S5: Top down view of skin sections on the confocal microscope at 10  $\mu\text{m}$  depth from the stratum corneum**

*Ex vivo* mouse skin exposed to QDs coated with different ligands was imaged using confocal microscopy. Organic-QDs are retained in skin to a much greater extent compared to all other treatment groups. PEI-QDs penetrate the least through the stratum corneum. Scale Bar=5  $\mu\text{m}$ .

# Supplementary Figure S6

Vehicle Control

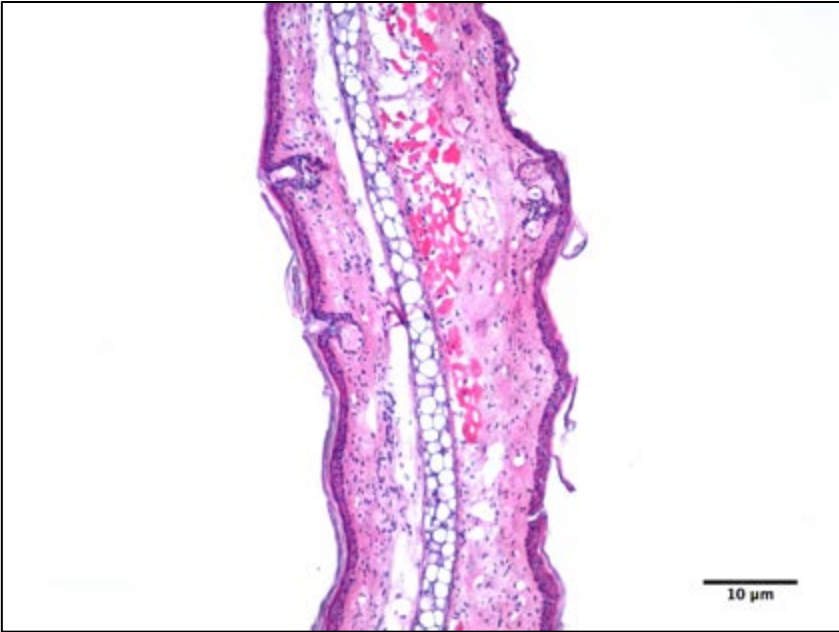

0.2% DNFB

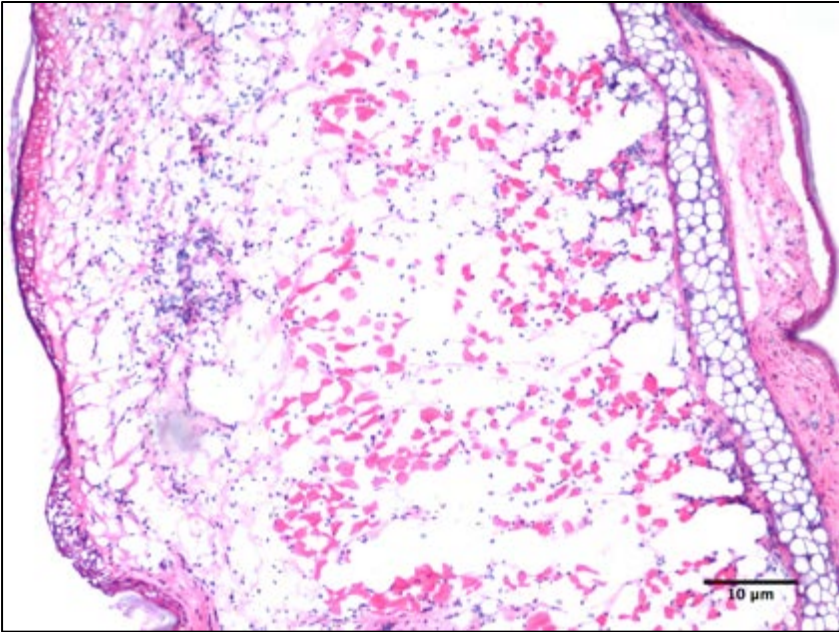

0.2% DNFB + GSH-QD

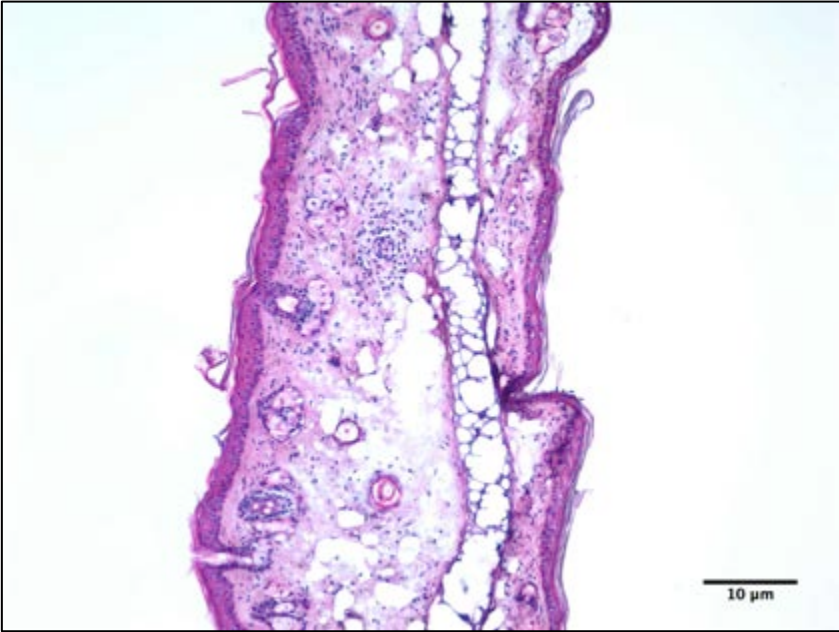

0.2% DNFB + Silica NP 20 nm

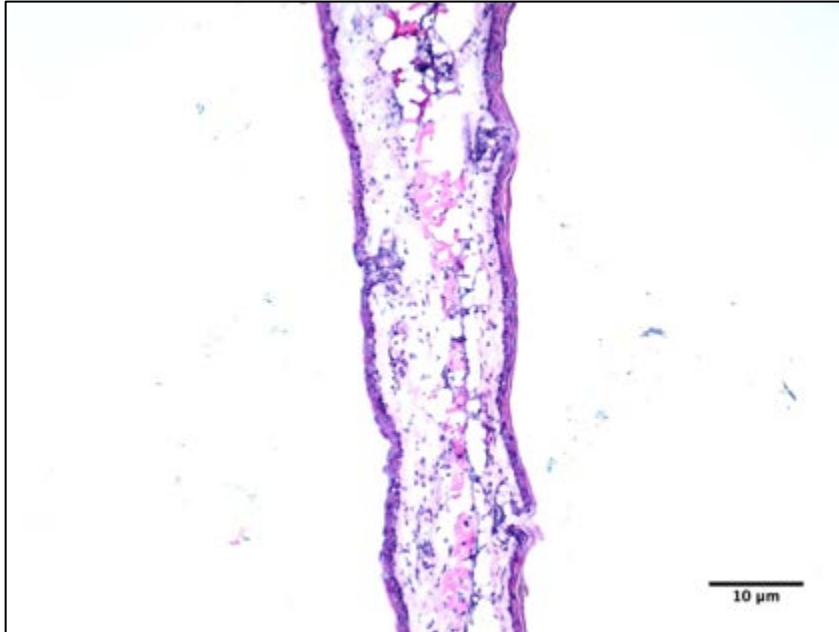

# Supplementary Figure S6

Vehicle Control

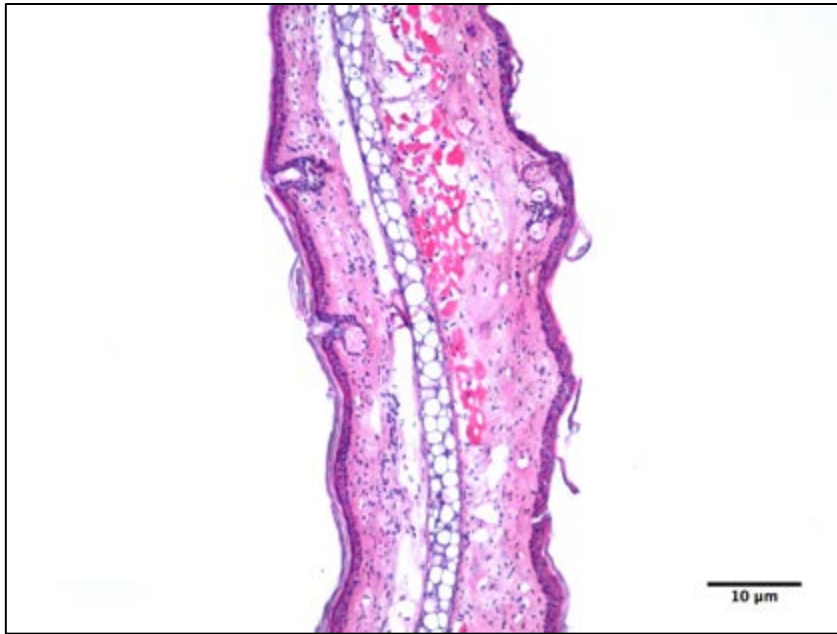

0.2% DNFB

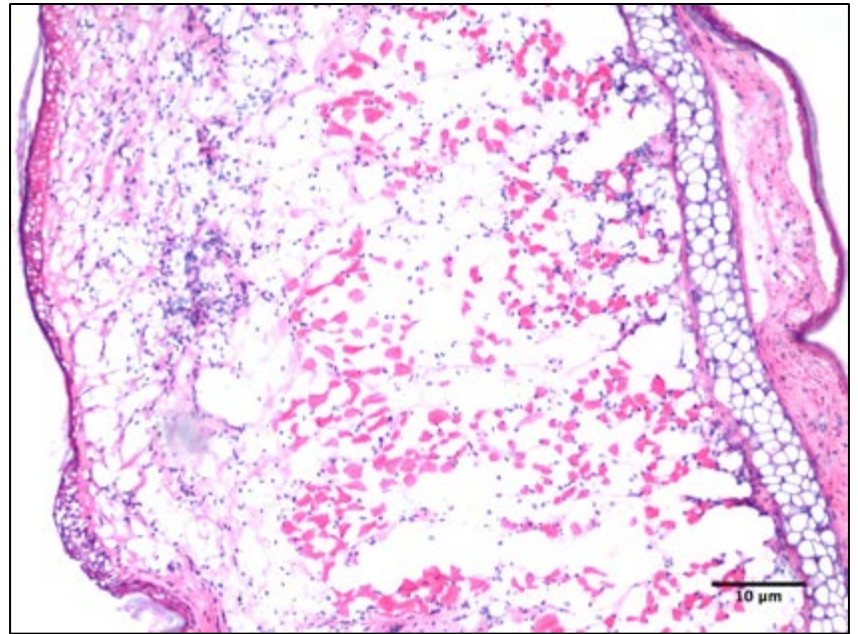

0.2% DNFB + CNT

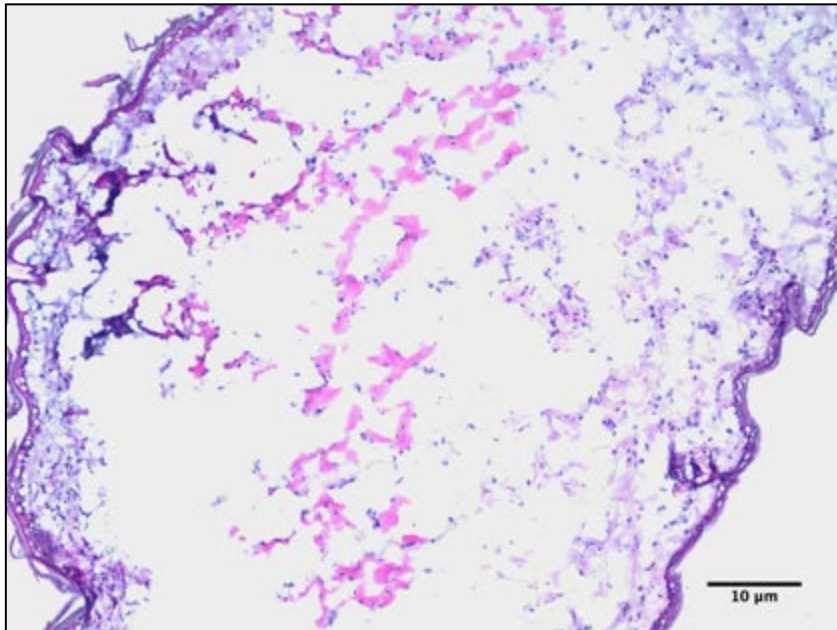

0.2% DNFB + Titanium dioxide

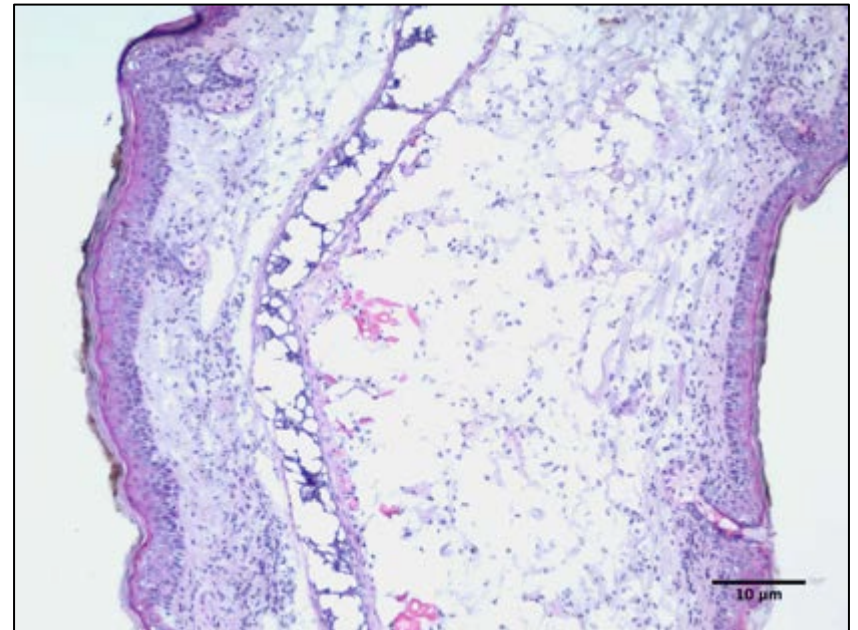

## **Supplementary Figure S6: Ear Sections stained with H&E (Hematoxylin and Eosin Stain)**

H&E sections from mouse ears show inhibition of the ear swelling response in the case of GSH-QDs and Silica NP (20nm) compared to vehicle ear. There are fewer cell infiltrates observed in these ear sections. A huge swelling response is observed in the DNFB, DNFB+CNT, DNFB+ TiO<sub>2</sub> treated ears. A large number of cell infiltrates can be observed in these sections.



**Supplementary Figure S7**

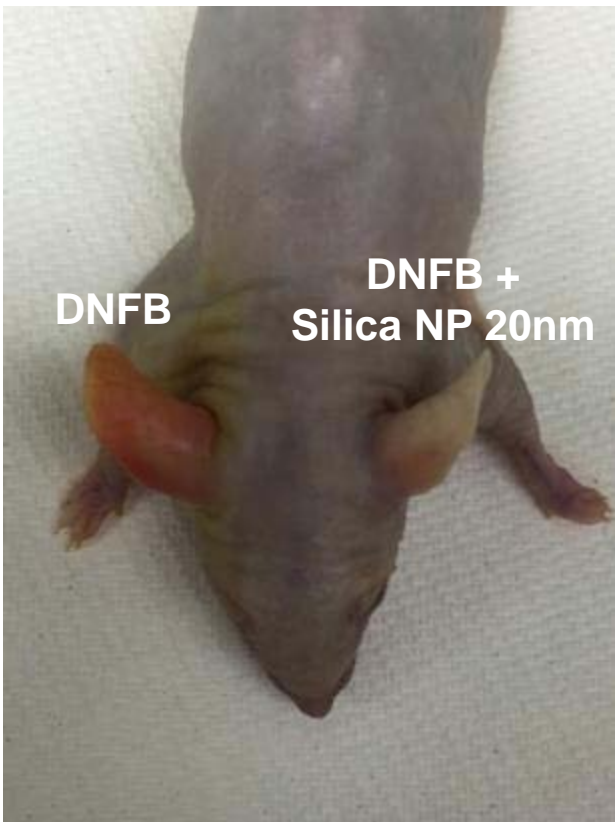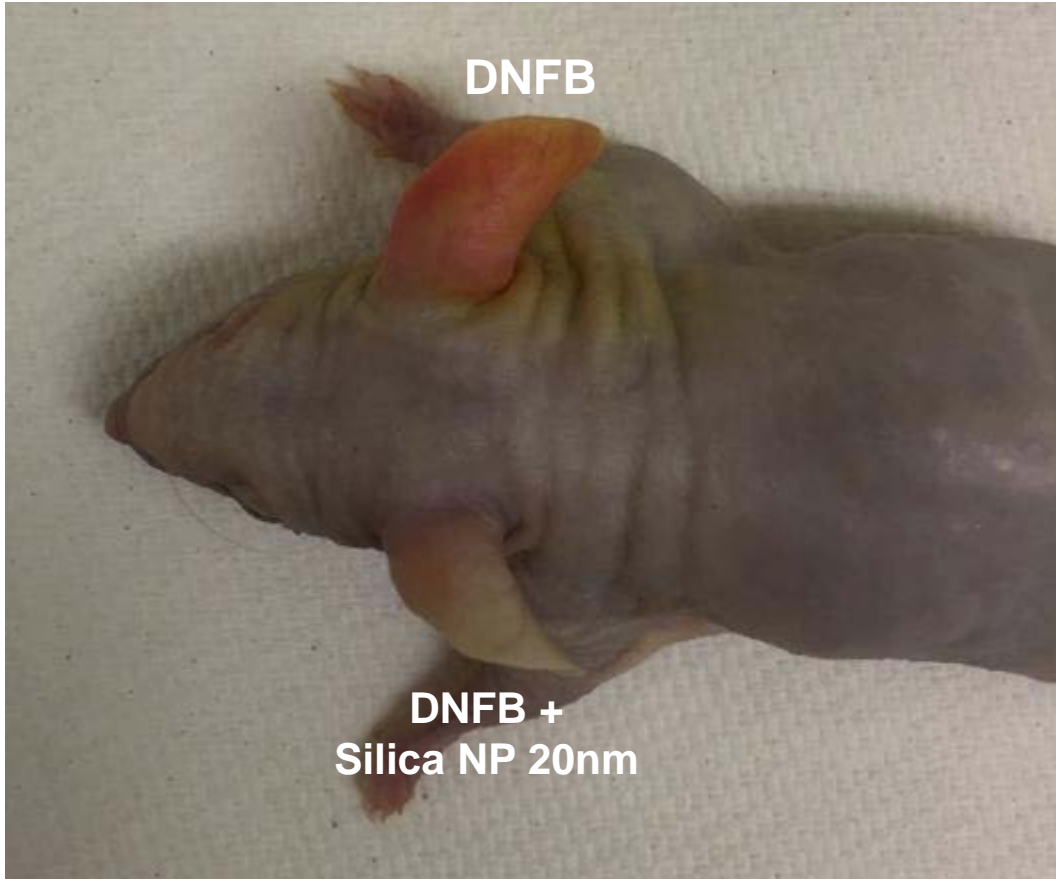

**Supplementary Figure S7: Gross Representation of the Ear Swelling Response when co-challenged with Silica NP 20nm**

## Supplementary Figure S8

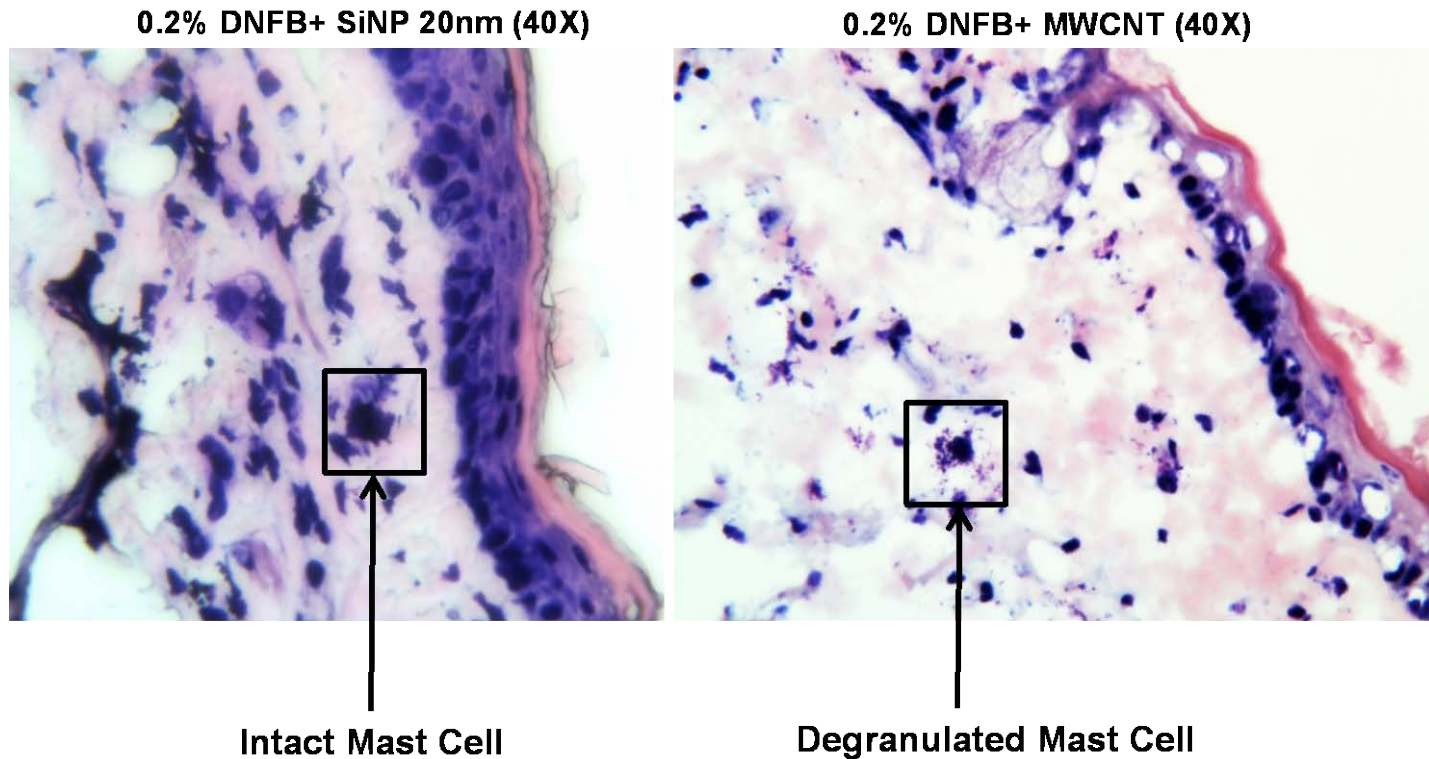

### **Figure S8. Quantification of intact vs. degranulated mast cells in tissue stained with Geimsa.**

Mast cells were quantified at 40X magnification in individual tissue slices treated with various DNFB+NP combinations. Shown in the figure above are representative examples of intact and degranulated mast cells (Geimsa stain). Dermatopathologist, Dr. Glynis Scott from Dermatology (URMC), verified the count.
